# Supplementary material for: Sars-CoV-2 attack rate in reception and accommodation centres for asylum seekers: systematic review of outbreak media reports in Germany
Source: bioRxiv or medRxiv preprint supplement (doi:10.1101/2021.03.12.21249641), 2021-03-12

Funnel plot of Sars-CoV-2 attack rate by accommodation size with pseudo 95% confidence limits

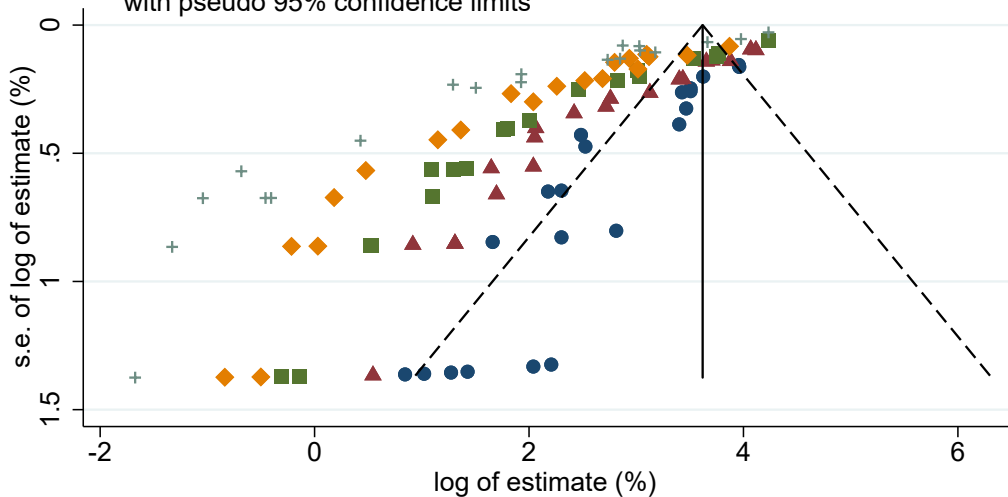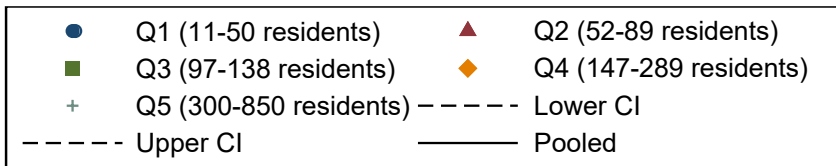

# Forest plot of Sars-CoV-2 attack rate for each facility and pooled estimates, by accommdation size

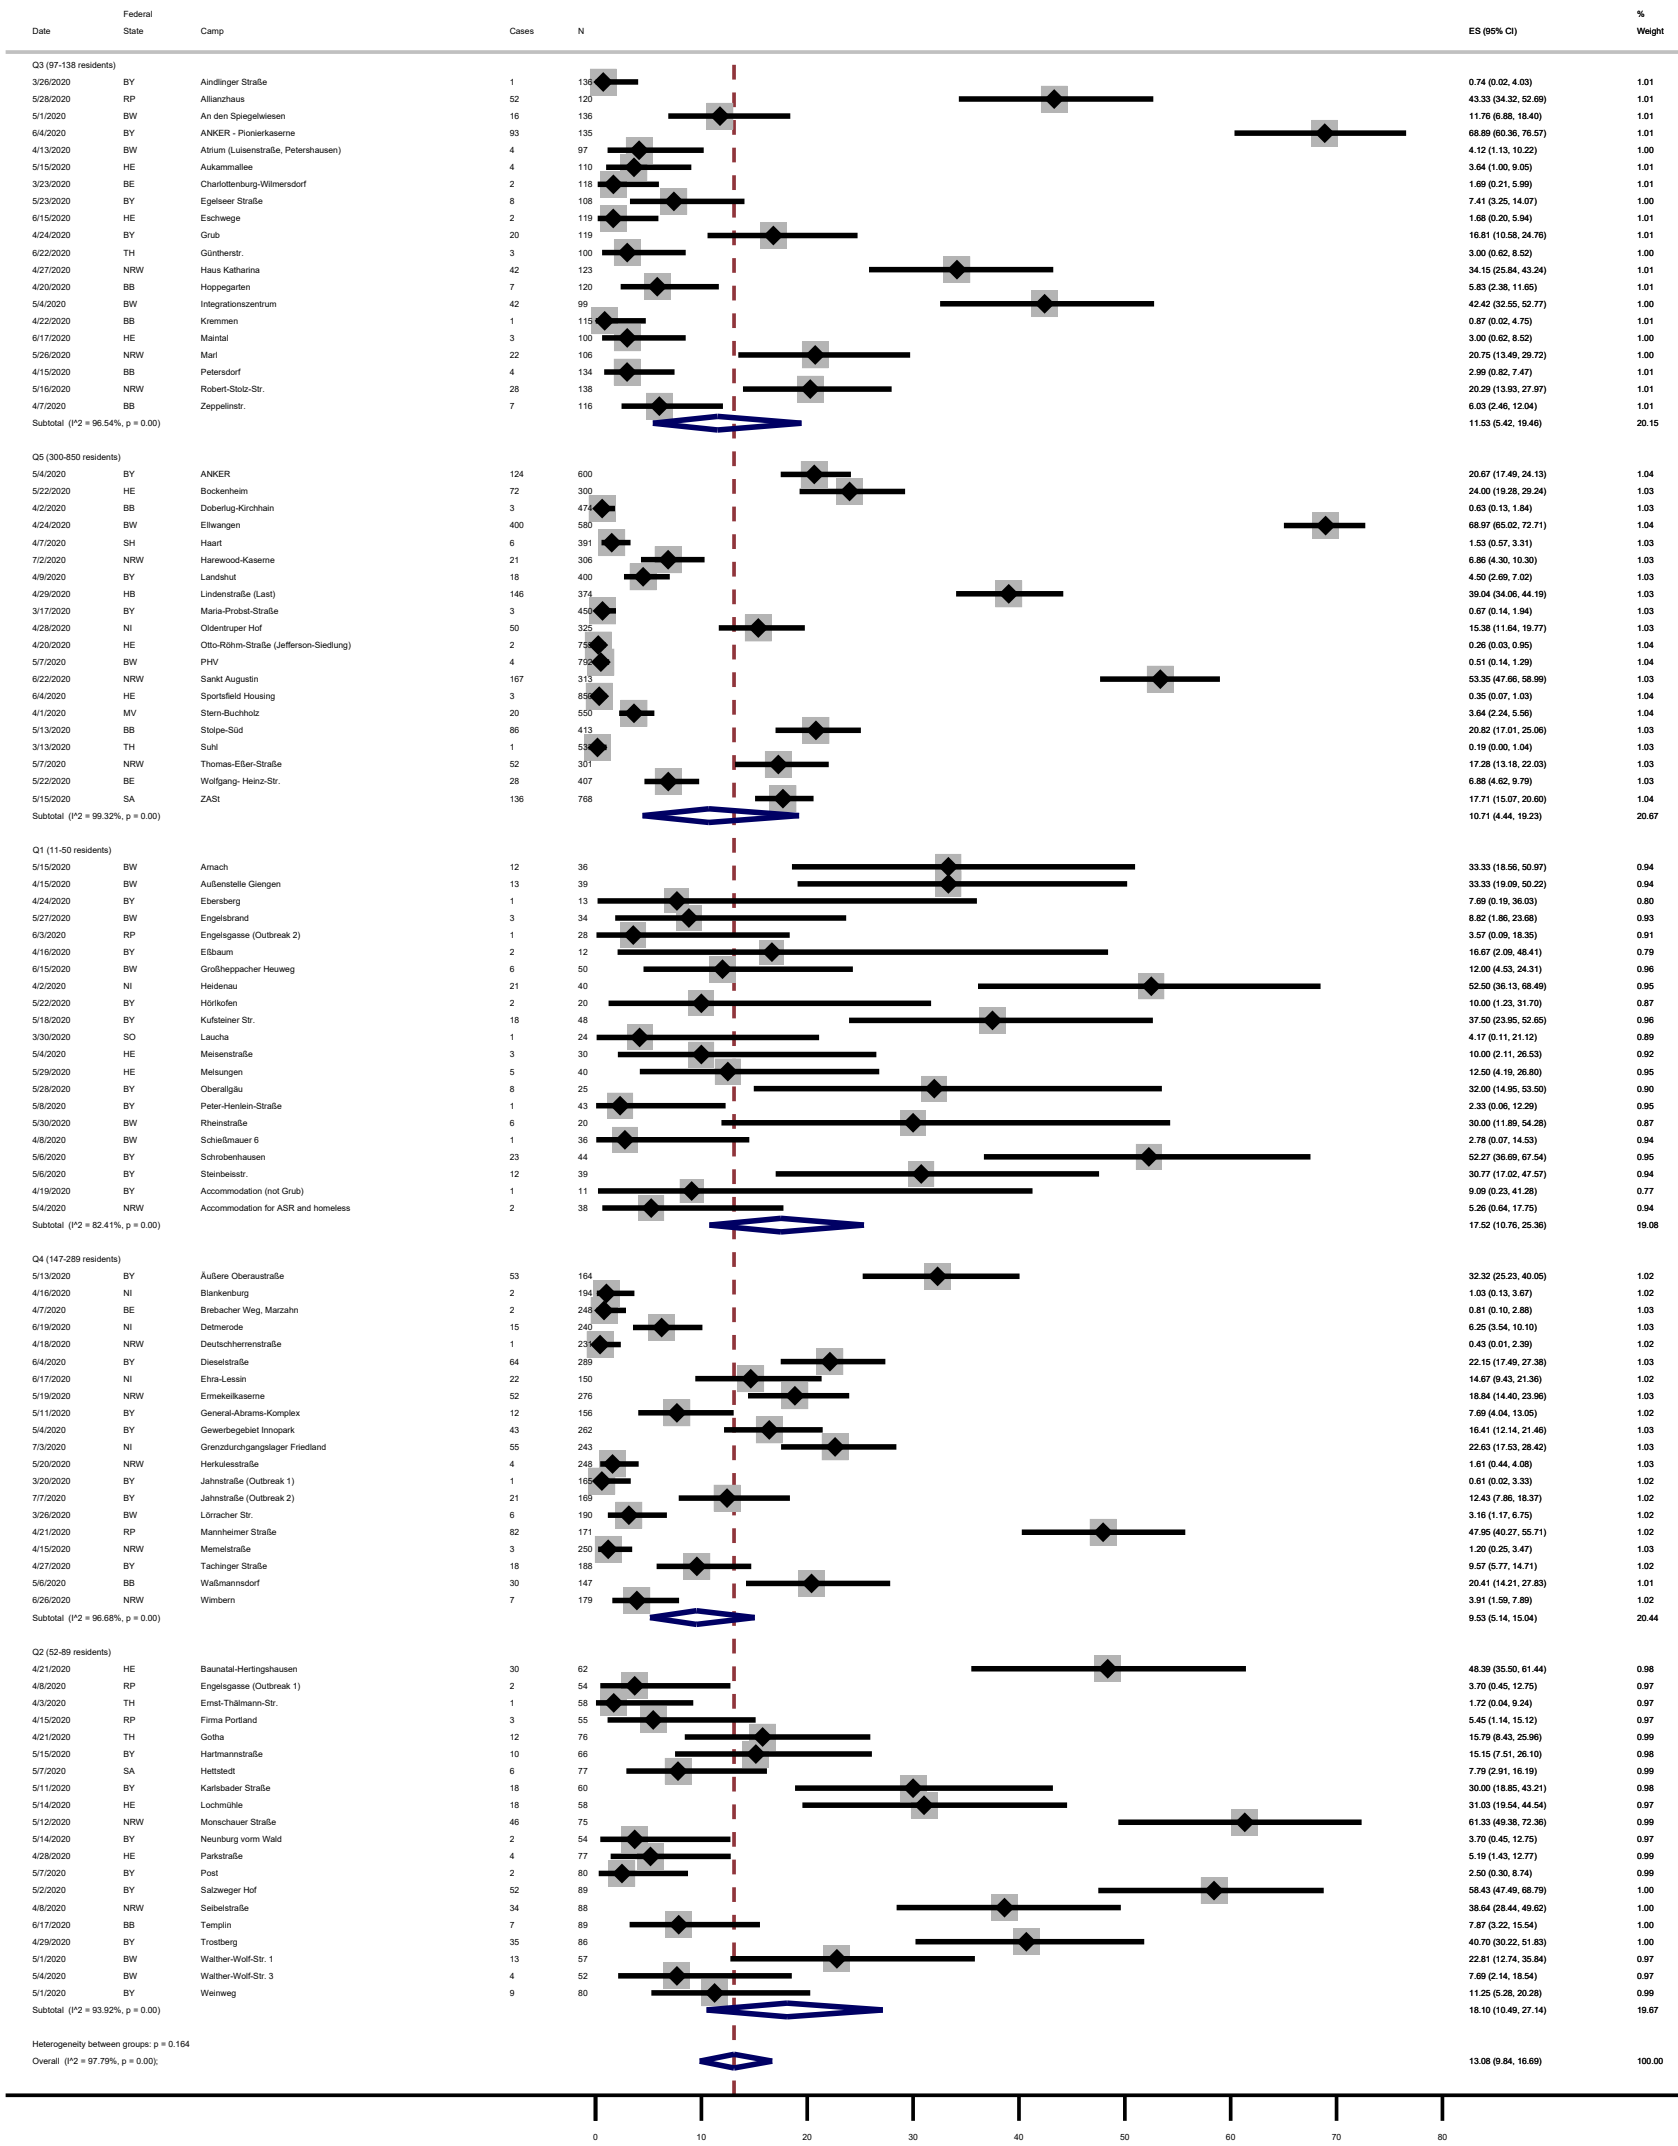

Supplement: Supplementary file [file media-2.pdf]
