# Supplementary material for: Sars-CoV-2 attack rate in reception and accommodation centres for asylum seekers: systematic review of outbreak media reports in Germany
Source: bioRxiv or medRxiv preprint supplement (doi:10.1101/2021.03.12.21249641), 2021-03-12

Forest plot of Sars-CoV-2 attack rate for each facility and pooled estimate, by type of quarantine, excluding n=7 facilities with attack rates above 50% (sensitivity analysis 1)

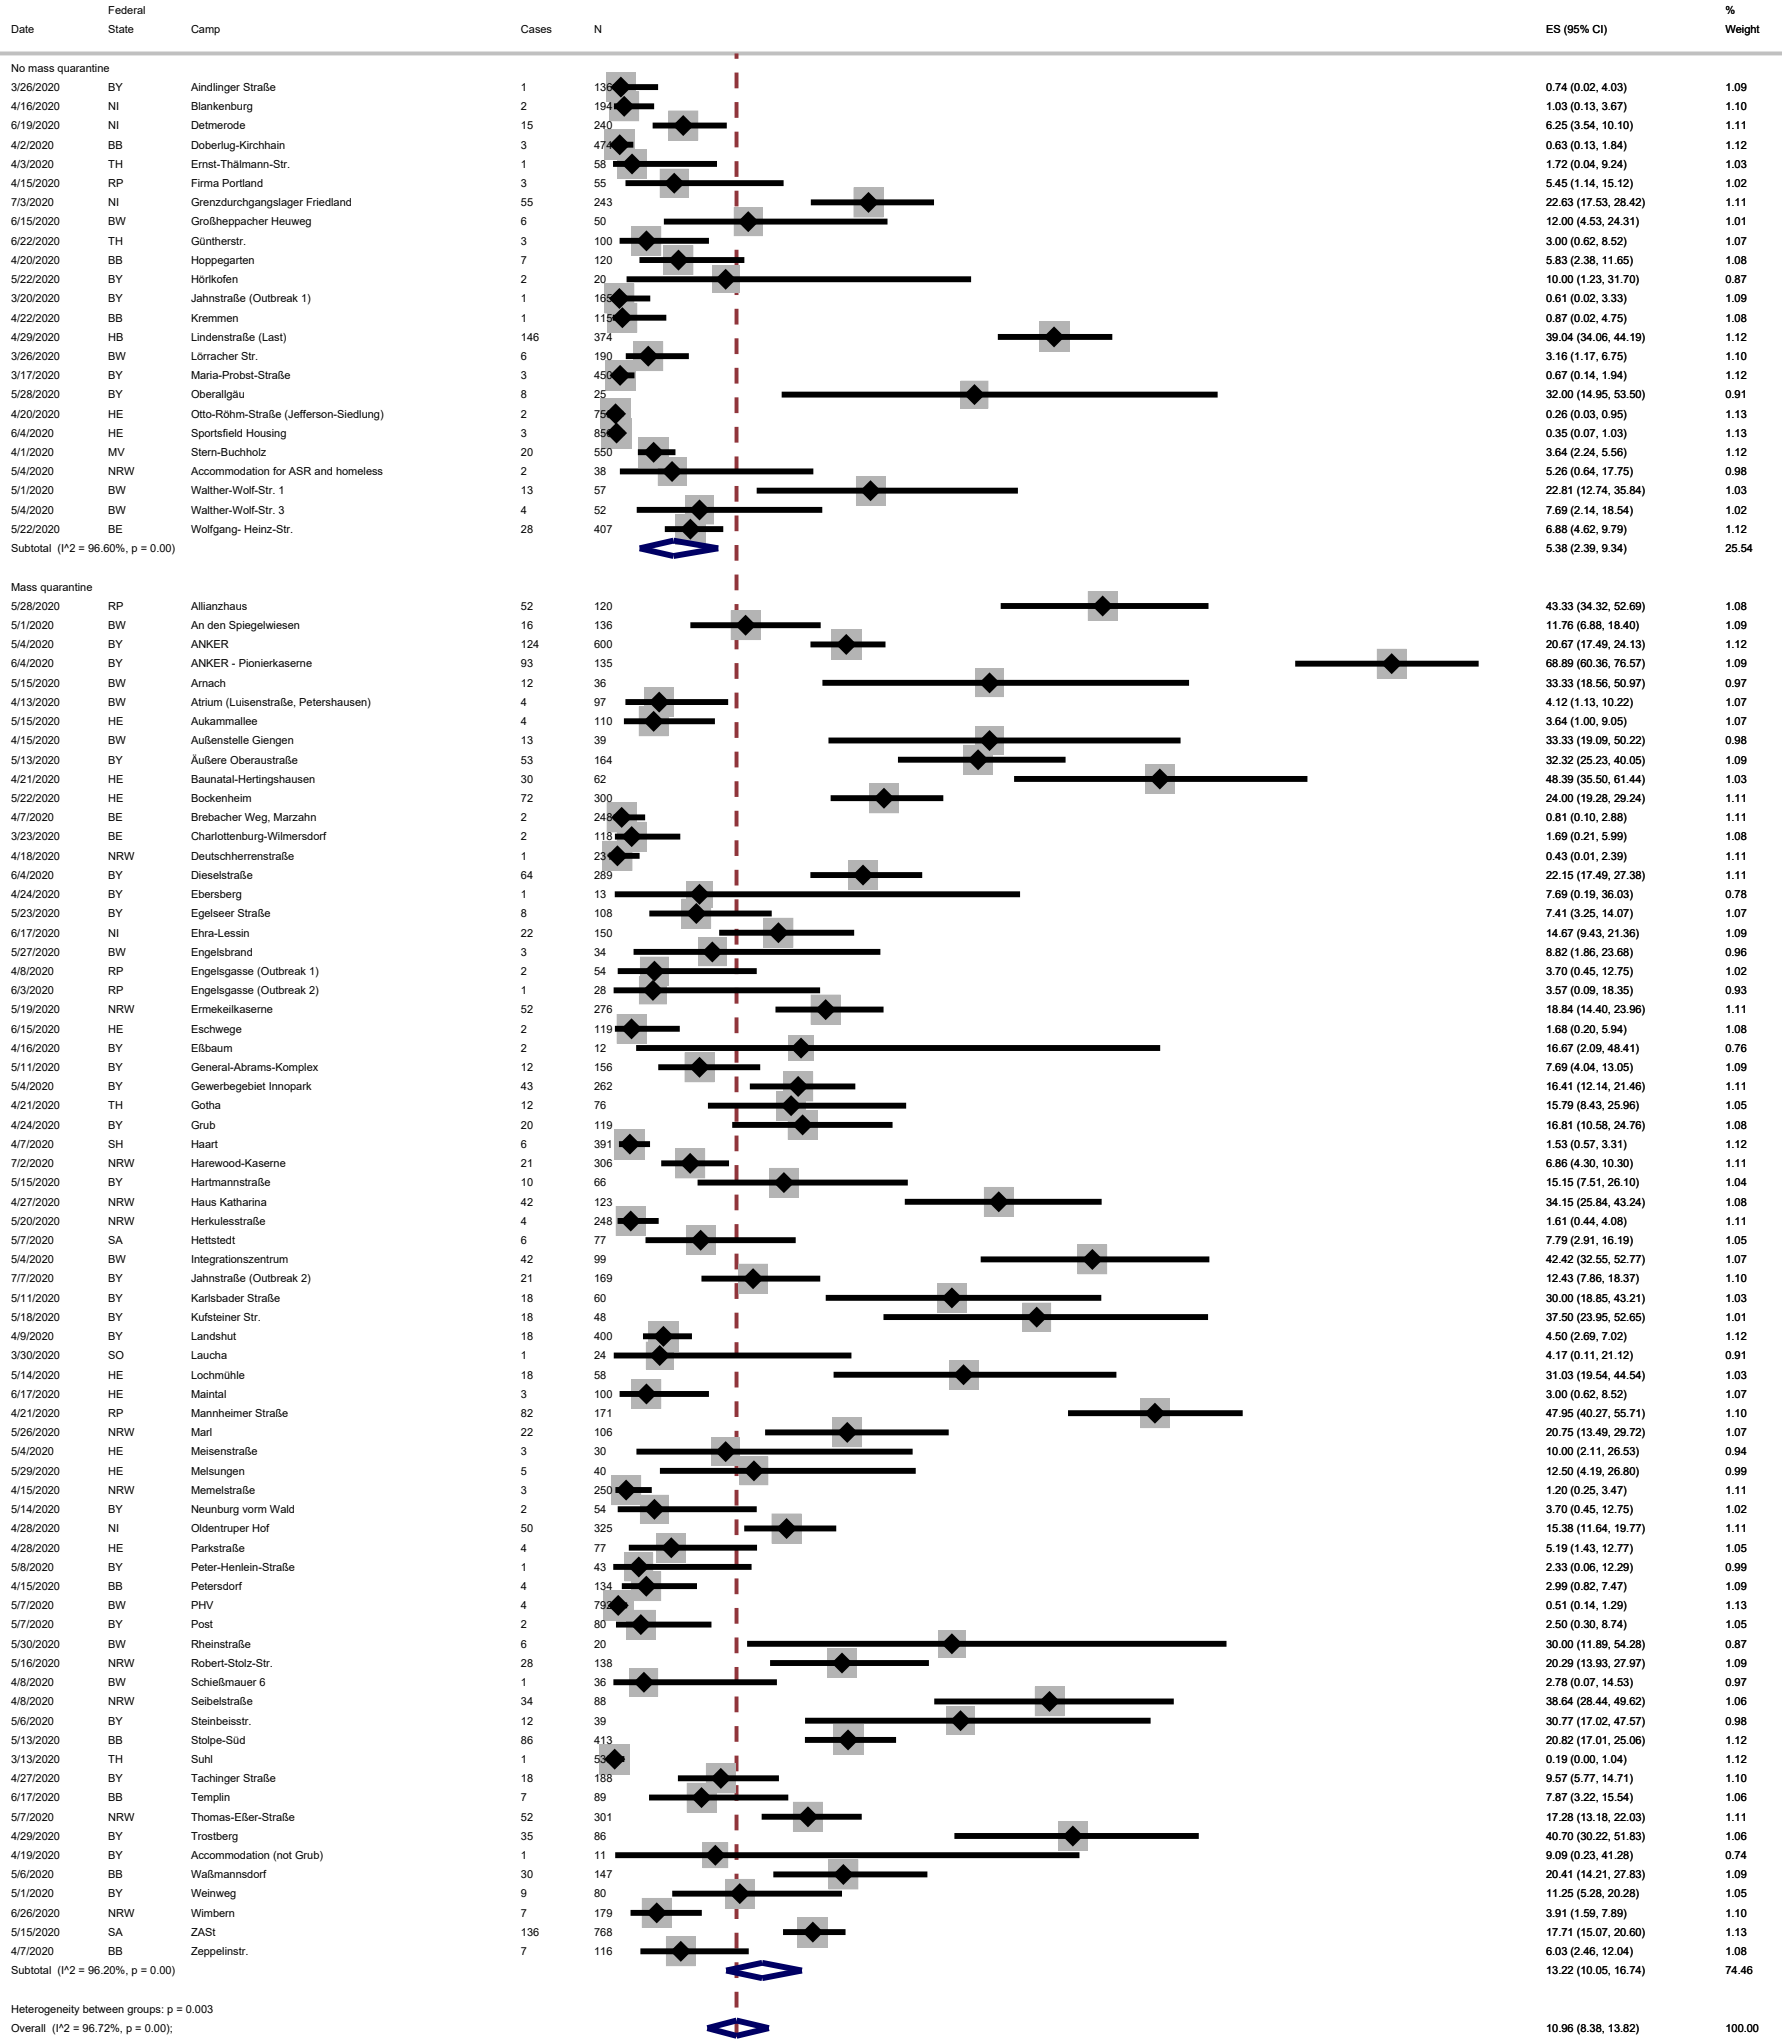

# Forest plot of Sars-CoV-2 attack rate for each facility and pooled estimate, by testing strategy (sensitivity analysis 2)

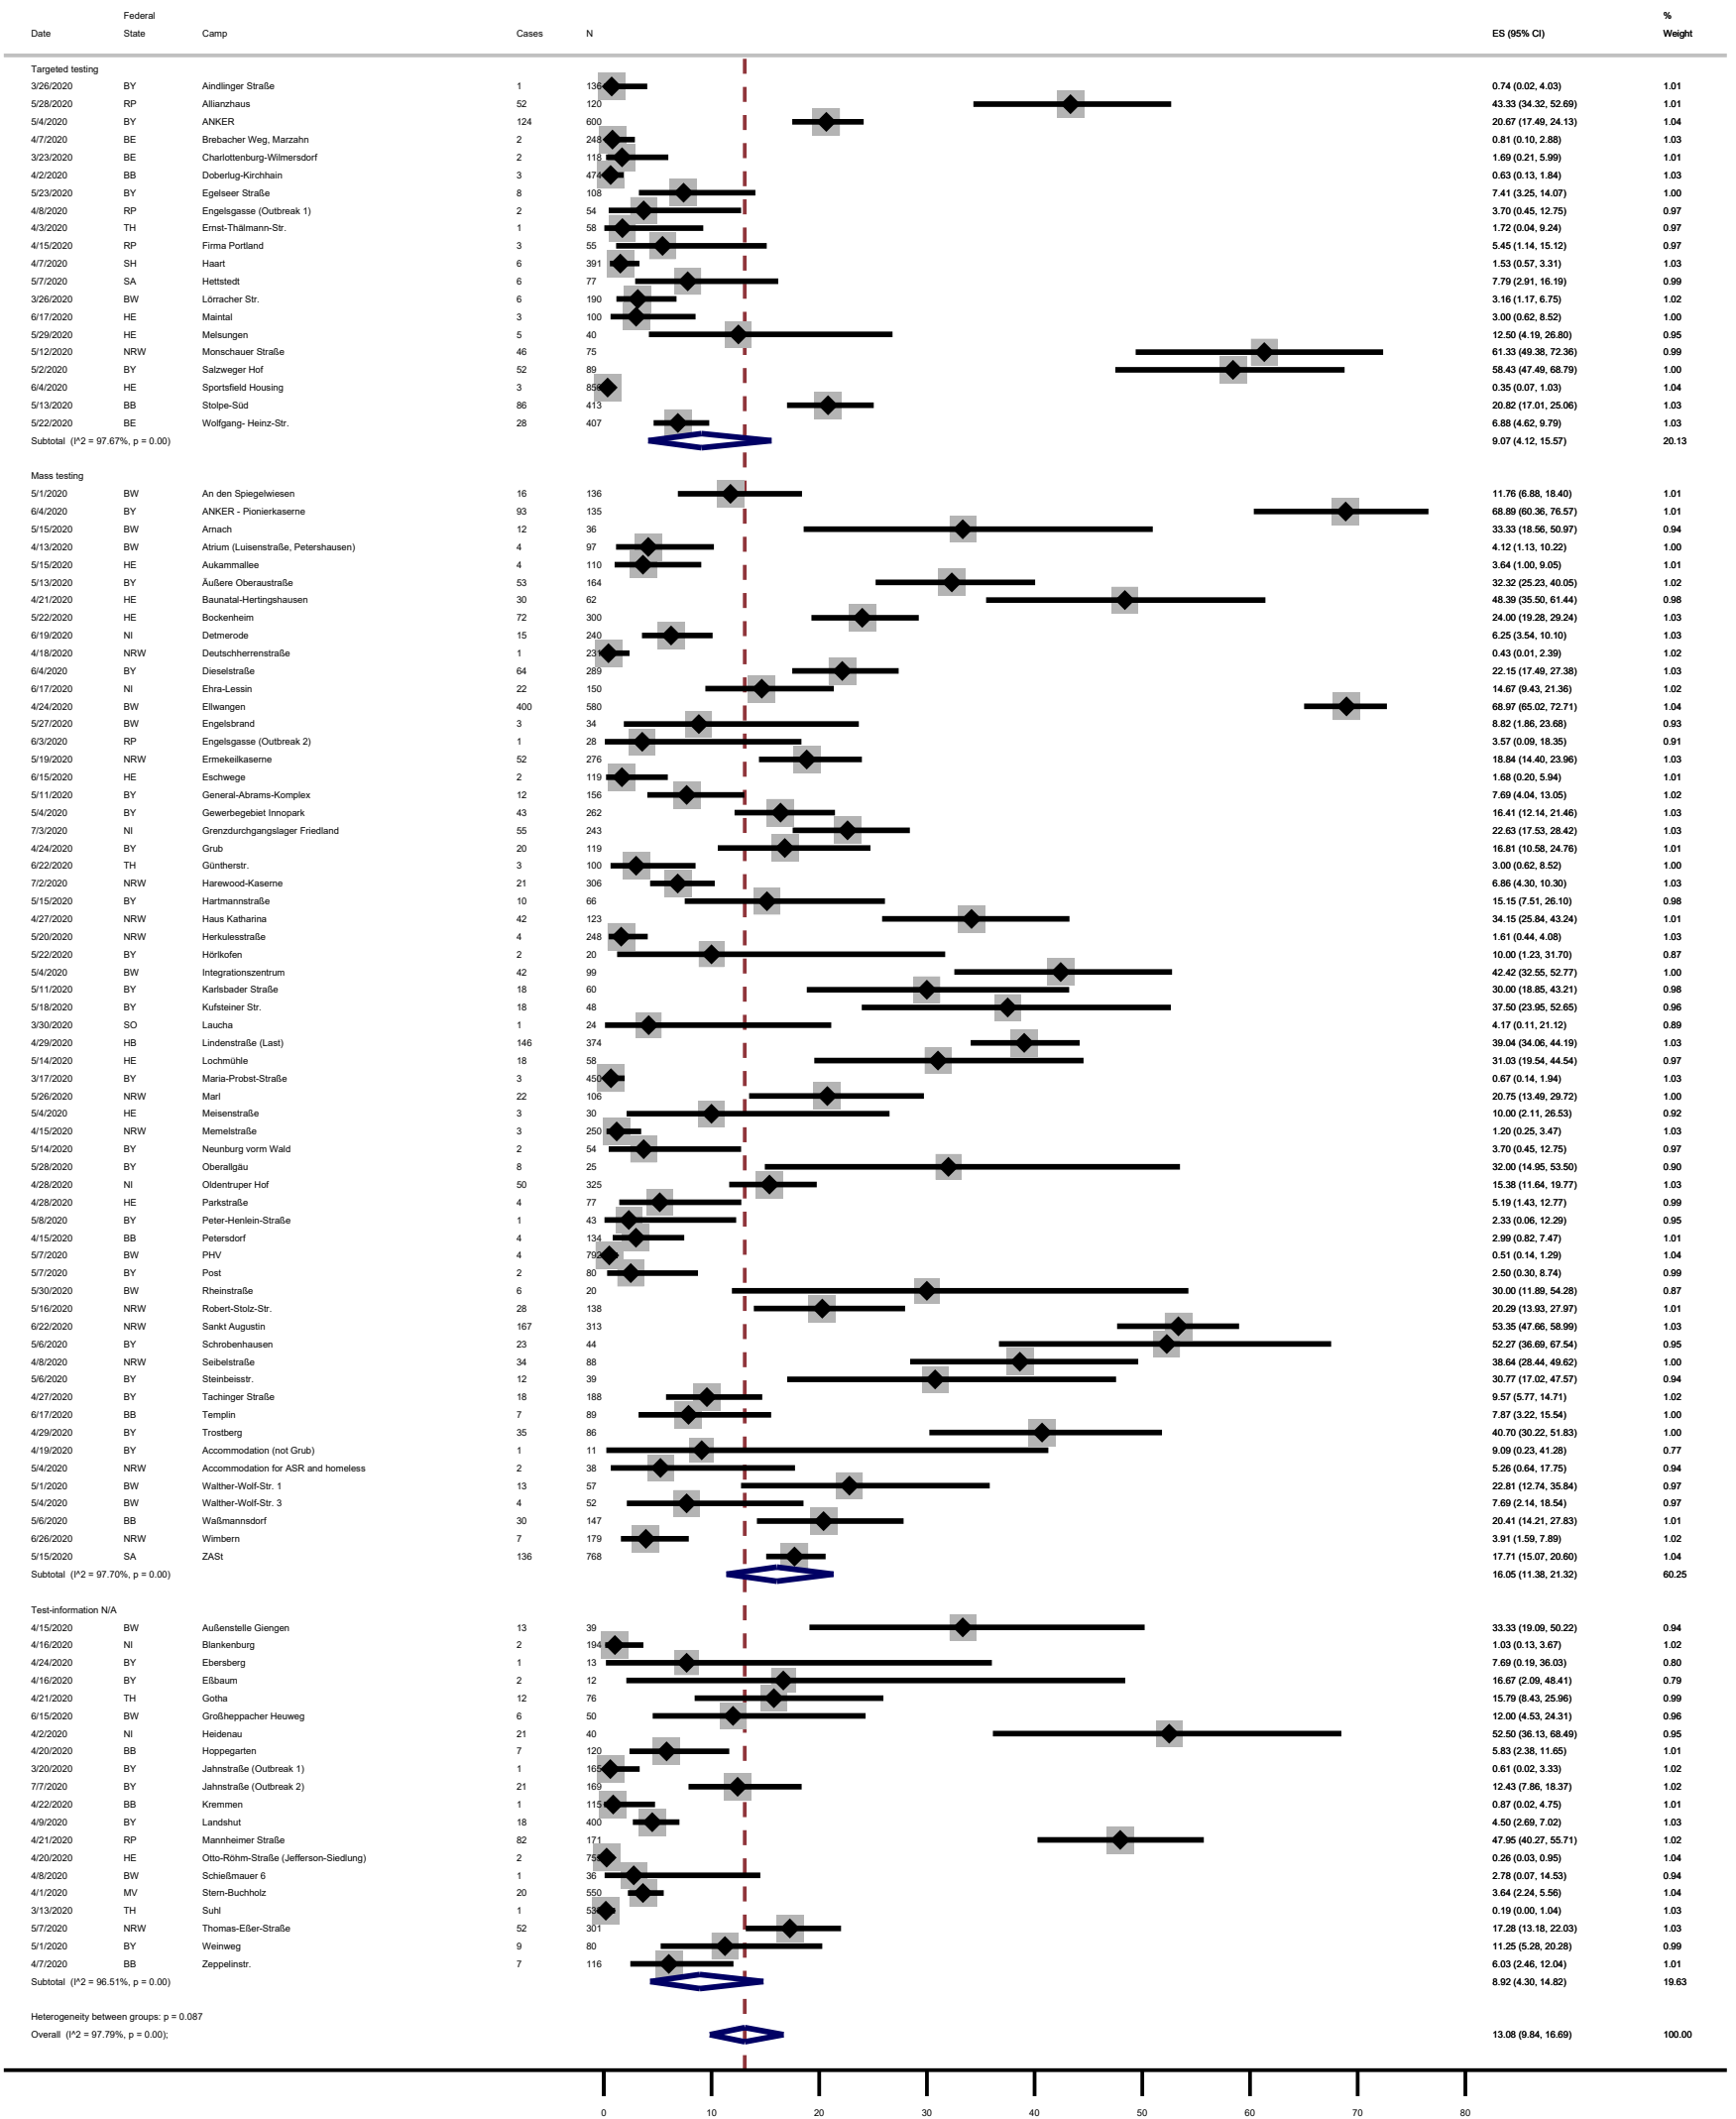

Supplement: Supplementary file [file media-4.pdf]
